# Supplementary material for: Construction of a Genome-Scale Kinetic Model of Mycobacterium Tuberculosis Using Generic Rate Equations
Source: Metabolites. 2012 Jul 3;2(3):382–97. doi: 10.3390/metabo2030382 (PMC3901218; doi:10.3390/metabo2030382)
Supplement: Supplementary File 4 — Supplementary (XLSX, 103 KB) [file metabolites-02-00382-s004.xlsx]

## Sheet: Sheet1
	Results from Beste et al (2007)			Results from our genome-scale kinetic model					Relative change in fluxes with changes in glycerol consumption rate.
	Glycerol uptake level at:				Glycerol uptakelevel at:				Experiment A, B and C.
Reaction	0	0.5	1		0	0.5	1
R1	0.003924	0.50366	1.0034		0.00392402	0.503674	1.0034
R2	0	0	0		0	0	0
R3	0	0	0		0	0	0
R4	0	0	0		0	0	0
R5	0	0	0		0	0	0
R6	0	0	0		0	0	0
R7	0.001	0.001	0.001		0.000999998	0.001	0.000999998
R8	0.001	0.001	0.001		0.001	0.000999998	0.000999998
R9	0.001	0.001	0.001		0.000999756	0.000999988	0.000999846
R10	0	0	0		0	0	0
R11	0.000521	-0.001137	-0.002749		0	0.00113699	0.00274915
R12	-0.000479	-0.002137	-0.003749		0	0.00213695	0.0037492
R13	0.000479	0.002137	0.003749		0	0.002137	0.003749
R14	0.000297	0.001328	0.002329		0	0.001328	0.002329
R15	0	0	0		0	0	0
R16	0	0	0		0	0	0
R17	0	0	0		0	0	0
R18	0.001	0.001	0.001		0.000999996	0.001	0.000999998
R19	0.001	0.001	0.001		0.001	0.000999998	0.001
R20	-0.000795	-8.4e-05	0.000606		0	0	0
R21	0	0	0.000606		0	0	0
R22	7.7e-05	0.000344	0.000604		0	0	0
R23	7.7e-05	0.000344	0.000604		0	0	0
R24	0	0	0		0	0	0
R25	0.001	0.001	0.001		0.001	0.001	0.001
R26	0.001	0.001	0.001		0.00099989	0.000999842	0.00100073
R27	0.000795	8.4e-05	0		0	0	0
R28	0.002901	0.002557	0.002828		0.00290039	0.002557	0.002828
R29	0.002901	0.002557	0.002828		0.00290081	0.00255687	0.00282726
R30	-0.001901	-0.001557	-0.001828		0.00190103	0.00155699	0.001828
R31	0.001697	0.000649	0.000235		0.00169702	0	0
R32	0.001267	0.002191	0.00309		0.00126648	0.002191	0.00308999
R33	0.003	0.003	0.003		0.003	0.003	0.003
R34	0.004901	0.004557	0.004828		0.004901	0.004557	0.004828
R35	0	0	0		0	0	0
R36	0	0	0		0	0	0
R37	0	0	0		0	0	0
R38	7e-06	3.1e-05	0.00066		0	0	0
R39	0	0	0		0	0	0
R40	0	0	0		0	0	0
R41	0	0	0		0	0	0
R42	0	0	0		0	0	0
R43	0.01295	0.111236	0.207558		0.01295	0.111236	0.207572
R44	-0.01295	-0.111236	-0.207558		0.012948	0.111236	0.207558
R45	-0.007133	0.393944	0.796665		0.00713288	0.393948	0.796684
R46	-0.032447	0.221728	0.479959		0.0320033	0.221728	0.479957
R48	-0.032447	0.221728	0.479959		0.032447	0.221723	0.479964
R49	-0.077595	-0.015883	0.055124		0.0775763	0.0158835	0.0551086
R50	-0.077595	-0.015883	0.055124		0.0775996	0.0158819	0.0551224
R51	0	0	0		0	0	0
R52	0	0	0		0	0	0
R53	0	0	0		0	0	0
R54	0.058002	0.075281	0.092418		0.0580021	0.0752945	0.092418
R55	0.094771	0.090955	0.087803		0.094775	0.0909547	0.0878029
R56	0.096776	0.092977	0.089842		0.0967621	0.0929813	0.089842
R57	0.096776	0.092977	0.089842		0.0967751	0.0929837	0.0898361
R58	0	0.003383	0.013332		0	0.00338289	0.0133319
R61	0	0	0		0	0	0
R63	-7.7e-05	-0.000344	-0.001211		0	0	0.001211
R64	0.229818	0.49104	0.740627		0.229821	0.491054	0.740633
R65	0.301484	0.508856	0.707071		0.301484	0.508781	0.707161
R66	0	0	0		0	0	0
R67	0	0	0		0	0	0
R68	0.002	0.002	0.002		0.002	0.00200001	0.002
R69	0	0	0		0	0	0
R70	0.001	0.001	0.001		0.000999996	0.001	0.000999999
R71	0.001	0.001	0.001		0.001	0.001	0.001
R72	0.032948	0.074778	0.113066		0.0329479	0.074778	0.113066
R73	0	0	0		0	0	0
R74	0	0	0		0	0	0
R75	0.004	0.004	0.004441		0.004	0.00399985	0.004441
R76	0.004	0.004	0.004441		0.00399993	0.00400001	0.004441
R77	0	0	0		0	0	0
R78	0.002673	0.001312	0.001		0.002673	0.001312	0.001
R79	0.001	0.001	0.001		0.00099999	0.000999918	0.000999996
R80	0	0	0		0	0	0
R81	0	0	0		0	0	0
R82	0.065617	0.081335	0.097965		0.0656082	0.0813364	0.0979648
R83	0.065617	0.081335	0.097965		0.0656067	0.081335	0.0980065
R84	0.065617	0.081335	0.097965		0.0656164	0.0813334	0.09797
R85	0.065617	0.081335	0.097965		0.065617	0.0813351	0.0979615
R86	0	0	0		0	0	0
R87	0	0	0		0	0	0
R88	0	0	0		0	0	0
R89	0	0	0		0	0	0
R90	-0.023976	-0.118891	-0.211935		0.0239773	0.118918	0.211947
R91	0.023799	0.118097	0.210541		0.0237957	0.118102	0.210535
R92	-0.000826	-0.000794	-0.001055		0	0	0.00105525
R93	0	0	0		0	0	0
R94	0.011973	0.059368	0.105311		0.0119722	0.059368	0.105311
R95	0	0	0		0	0	0
R96	0.012003	0.059523	0.106624		0.012003	0.059523	0.106624
R97	-0.011973	-0.059368	-0.105311		0.011973	0.0593707	0.105311
R98	0	0	0		0	0	0
R99	0	0	0		0	0	0
R100	0	0	0		0	0	0
R101	-0.08186	-0.021108	0.046891		0	0	0.046891
R102	0.096776	0.089594	0.07651		0.096776	0.0895938	0.0765103
R103	0.102615	0.090594	0.07751		0.102539	0.0905941	0.07751
R104	0	0	0		0	0	0
R105	0.001	0.001	0.001		0.001	0.000999997	0.001
R106	0.06058	0.311921	0.556278		0.06058	0.311921	0.556277
R107	0.06058	0.311921	0.556278		0.0605752	0.311928	0.556343
R108	8.3e-05	0.000784	0.00213		0	0	0.00212891
R109	0	0	0.000479		0	0	0
R110	0	0	0		0	0	0
R111	0	0	0.000479		0	0	0
R112	0	0	0.000479		0	0	0
R113	0	0	0		0	0	0
R114	0	0	0		0	0	0
R119	0.525974	1.53996	2.53401		0.525974	1.53997	2.53401
R120	0	0	0		0	0	0
R121	0	0	0		0	0	0
R122	0.289732	0.274768	0.255142		0.289732	0.274768	0.255142
R123	-0.125415	-0.102184	-0.078935		0.125415	0.102225	0.0789349
R124	5e-06	2.1e-05	3.7e-05		0	0	0
R125	0.873738	1.89015	2.8818		0.873736	1.89014	2.8818
R126	0.873739	1.89015	2.88181		0.873739	1.89016	2.88181
R127	0	0	0		0	0	0
R128	1.83942	4.41642	6.93693		1.83942	4.41642	6.93696
R129	1	1	1		1	1	1
R130	0	0	0		0	0	0
R131	0.060699	0.218739	0.375752		0.0606989	0.218739	0.375754
R132	0	0	0		0	0	0
R133	0	0	-0.001437		0	0	0.00143701
R134	0.000504	0.00079	0.001386		0	0	0.00138657
R135	0	0	0		0	0	0
R136	0.001	0.001	0.001		0.001	0.001	0.00100021
R137	0.001	0.001	0.001		0.001	0.000999732	0.000999996
R138	0	0	0		0	0	0
R139	0.004838	0	0		0.004838	0	0
R140	0.004838	0	0		0.004838	0	0
R141	0.004838	0	0		0.00483741	0	0
R142	0	6.1e-05	0		0	0	0
R143	0	0	0		0	0	0
R144	0.000998	0.000259	0		0	0	0
R145	0	0.000732	0.002793		0	0	0.00279297
R146	2e-06	9e-06	1.6e-05		0	0	0
R147	2e-06	9e-06	1.6e-05		0	0	0
R148	0	0	0		0	0	0
R149	-0.056344	-0.074808	-0.093097		0.0563444	0.0748081	0.0930966
R150	0.058002	0.075281	0.092418		0.0580019	0.0752905	0.092418
R151	0.058002	0.075281	0.092418		0.0580019	0.0751953	0.092418
R152	0.058002	0.075281	0.092418		0.058002	0.0752828	0.092418
R153	0.058002	0.075281	0.092418		0.0580123	0.0752782	0.0924178
R154	0.058002	0.075281	0.092418		0.0580018	0.0752781	0.0924182
R155	0.058002	0.075281	0.092418		0.058002	0.0753014	0.0924222
R156	0	0	0		0	0	0
R157	-7.7e-05	-0.000344	-0.000604		0	0	0
R158	0	0	0		0	0	0
R159	7.7e-05	0.000344	0.000604		0	0	0
R160	0	0	0		0	0	0
R161	0	0	0		0	0	0
R162	0	0	0		0	0	0
R163	0	0	0		0	0	0
R164	0	0	0		0	0	0
R165	0	0	0		0	0	0
R166	0	0	0		0	0	0
R167	0	0	0		0	0	0
R168	0	0	0		0	0	0
R169	0	0	0		0	0	0
R170	0	0	0		0	0	0
R171	0	0	0		0	0	0
R172	0	0	0		0	0	0
R173	0	0	0		0	0	0
R174	0	0	0		0	0	0
R175	0	0	0		0	0	0
R176	7.4e-05	0.000332	0.000582		0	0	0
R177	0.000813	0.000164	0		0	0	0
R178	0	0	1e-06		0	0	0
R179	0	0	1e-06		0	0	0
R180	0	0	1e-06		0	0	0
R181	0	0	0		0	0	0
R182	0	0	0		0	0	0
R183	0.001673	0.000312	0		0.00167224	0	0
R184	0.015308	0.077221	0.137745		0.015308	0.077221	0.137739
R185	0.04548	0.23604	0.421638		0.04548	0.23604	0.421638
R186	0.015308	0.077221	0.137745		0.015308	0.0771484	0.137746
R187	0.015308	0.077221	0.137745		0.015308	0.0772213	0.137747
R188	0	0	0		0	0	0
R189	5e-06	2.2e-05	0		0	0	0
R190	0	0	0		0	0	0
R191	0	0	0		0	0	0
R192	0	0	0		0	0	0
R193	0	0	0		0	0	0
R194	0	0	0		0	0	0
R195	0	0	0		0	0	0
R196	0	0	0		0	0	0
R197	0	0	0		0	0	0
R198	0	0	0		0	0	0
R199	0.002333	0	0.001857		0.002333	0	0.00185699
R200	0.002333	0	0.001857		0.002333	0	0.001857
R201	0.003331	0.000259	0.001857		0.00333036	0	0.00185631
R202	-0.000754	9.9e-05	0.000928		0	0	0
R203	0	0	0		0	0	0
R204	0	0	0.001809		0	0	0.001809
R205	0	0	0.001809		0	0	0.001809
R206	0	0	0.001809		0	0	0.00180899
R207	0	0	0.001809		0	0	0.00180899
R208	0	0.001276	0.004502		0	0.001276	0.004502
R209	0	0.001732	0.003793		0	0.00173189	0.003793
R210	0	0.001732	0.003793		0	0.001732	0.00379296
R211	0.05515	0.077935	0.101601		0.055149	0.0779408	0.101601
R212	0.05515	0.077935	0.101601		0.05515	0.077935	0.101603
R213	0.05515	0.077935	0.101601		0.0551509	0.0779326	0.101603
R214	-0.001269	0.001266	0.00373		0.001269	0.001266	0.00373
R215	0.001511	0	0		0.00151102	0	0
R216	0	0	0		0	0	0
R217	0	0	0		0	0	0
R218	0	0	0		0	0	0
R219	-0.058002	-0.075281	-0.092418		0.058002	0.0752325	0.0924176
R220	0	0.001529	0.004191		0	0.001529	0.004191
R221	0	0.001529	0.004191		0	0.00152923	0.00419145
R222	0	0.001529	0.004191		0	0.0015289	0.004191
R223	0	0.001529	0.004191		0	0.0015291	0.00419077
R224	0	0.001529	0.004191		0	0.001529	0.004191
R225	0.059235	0.315459	0.568194		0.059235	0.315457	0.568226
R226	0	0	0.000467		0	0	0
R227	0	0.000183	0.002644		0	0	0.00264401
R228	0	0.000183	0.002644		0	0	0.002644
R229	0	0.000183	0.002037		0	0	0.00203699
R230	0	0.000183	0.00183		0	0	0.00183
R231	0	0.000183	0.00183		0	0	0.00182975
R232	0	0	0.000606		0	0	0
R233	0	0	0.000303		0	0	0
R234	0	0	0.000606		0	0	0
R235	0	0	0.000606		0	0	0
R236	0	0	0.000606		0	0	0
R237	0.000205	0.000916	0.001606		0	0	0.00160595
R238	0	0	0		0	0	0
R239	0	0	0		0	0	0
R240	0	0	0		0	0	0
R241	0	0	0		0	0	0
R242	0	0	0		0	0	0
R243	0	0	0		0	0	0
R244	0	0	0		0	0	0
R245	8.3e-05	0.000784	0.00213		0	0	0.00213
R246	-0.000221	0.005942	0.011934		0	0.005942	0.011934
R247	0.045148	0.237611	0.424835		0.045148	0.237611	0.42482
R248	0.045148	0.237611	0.424835		0.045148	0.237611	0.424805
R249	0.045148	0.237611	0.424835		0.0451481	0.237305	0.424863
R250	0	0	0.000233		0	0	0
R251	0	0	0.000233		0	0	0
R252	0	0	0.000207		0	0	0
R253	0	0	0		0	0	0
R254	0	0	0.000207		0	0	0
R255	0	0	0		0	0	0
R256	0	0	0		0	0	0
R257	0.000162	0.000312	0		0	0	0
R258	0.000162	0.000312	0		0	0	0
R259	0.000252	0.001127	0.001977		0	0.00112305	0.00197714
R260	0.000245	0.001096	0.001922		0	0.00109614	0.00192201
R261	0	0	0		0	0	0
R262	0	0	0		0	0	0
R263	0	0	0		0	0	0
R264	0	0	0		0	0	0
R265	0	0	0		0	0	0
R266	0	0	0		0	0	0
R267	0	0	0		0	0	0
R268	0	0	0		0	0	0
R269	0	0	0		0	0	0
R270	3e-05	0.000154	0.001313		0	0	0.001313
R271	3e-05	0.000154	0.001313		0	0	0.00131338
R272	3e-05	0.000154	0.001313		0	0	0.00131256
R273	3e-05	0.000154	0.001313		0	0	0.001313
R274	3e-05	0.000154	0.001313		0	0	0.001313
R275	3e-05	0.000154	0.001313		0	0	0.001313
R276	3e-05	0.000154	0.001313		0	0	0.00131434
R277	0	0	0		0	0	0
R278	0	0	0		0	0	0
R279	0	0	0		0	0	0
R280	0	0	0		0	0	0
R281	0	0	0		0	0	0
R282	0	2.1e-05	0.001078		0	0	0.0010781
R283	0	2.1e-05	0.000791		0	0	0
R284	0	0	0		0	0	0
R285	0	0	0.000288		0	0	0
R286	0	0	0		0	0	0
R287	0.037951	0.179694	0.317836		0.0379509	0.179687	0.317836
R288	0	0.000544	0.001708		0	0	0.001708
R289	0	0.000544	0.001708		0	0	0.00170785
R290	0	0.000544	0.001708		0	0	0.001708
R291	0	0.000544	0.001708		0	0	0.001708
R292	0	0.000544	0.001708		0	0	0.001708
R293	0.000558	0.00249	0.004368		0	0.00249	0.004368
R294	0.001712	0.004181	0.007187		0.001712	0.004181	0.00718698
R295	0	0	0		0	0	0
R296	0.000201	0.000896	0.001571		0	0	0.001571
R297	9.6e-05	0.000428	0.000751		0	0	0
R299	9.6e-05	0.000428	0.000751		0	0	0
R300	0	0	0		0	0	0
R301	5e-05	0.000225	0.000394		0	0	0
R302	5e-05	0.000225	0.000394		0	0	0
R303	0	0	0		0	0	0
R304	5e-05	0.000225	0.000394		0	0	0
R305	5.7e-05	0.000255	0.000448		0	0	0
R306	0.000368	0.001644	0.002884		0	0.001644	0.002884
R307	0.000464	0.002072	0.003635		0	0.002072	0.003635
R308	0	0	0		0	0	0
R309	0	0	0		0	0	0
R310	0.000292	0.001306	0.00277		0	0.001306	0.00277
R311	0	0	0		0	0	0
R312	0.000346	0.001	0.001		0	0.001	0.000999997
R313	0.03033	0.156059	0.278296		0.03033	0.156059	0.27825
R314	0.03033	0.156059	0.278296		0.0303237	0.156059	0.278296
R315	0.03033	0.156059	0.278296		0.0303275	0.156059	0.278296
R316	0.03033	0.156059	0.278296		0.03033	0.156059	0.278296
R317	0.03033	0.156059	0.278296		0.03033	0.156059	0.278296
R318	0.03025	0.155862	0.277982		0.03025	0.155862	0.277996
R319	0.03025	0.155862	0.277982		0.03025	0.155862	0.277982
R320	0.03025	0.155862	0.277982		0.0302499	0.155863	0.27798
R321	0.03025	0.155862	0.277982		0.03025	0.155862	0.277982
R322	0.03025	0.155862	0.277982		0.030252	0.15585	0.277968
R323	0	0	0		0	0	0
R324	0	0	0		0	0	0
R325	0	0	0		0	0	0
R326	0	0	0		0	0	0
R327	0	0	0		0	0	0
R328	0	0	0		0	0	0
R329	5e-05	0.000225	0.000394		0	0	0
R330	5e-05	0.000225	0.000394		0	0	0
R332	2e-06	9e-06	1.6e-05		0	0	0
R333	0	0	0		0	0	0
R334	0.000352	0.001571	0.002		0	0.001571	0.002
R335	0.003	0.003	0.003		0.003	0.00300002	0.003
R336	0	0	0.000757		0	0	0
R337	0.001	0.001	0.001		0.001	0.000999999	0.000999992
R338	0.001005	0.001022	0.001039		0.001005	0.00102203	0.00103898
R338b	0.002005	0.002022	0.002039		0.002005	0.00202203	0.00203899
R339	-0.001	-0.001	-0.001		0.00100008	0.000999974	0.001
R340	0.002007	0.002031	0.002055		0.00200684	0.002031	0.00205078
R341	-0.000352	-0.001	-0.001		0	0.001	0.001
R342	0	0	0		0	0	0
R343	0	0	0		0	0	0
R344	0	0	0		0	0	0
R345	0	0	0		0	0	0
R346	0	0	0		0	0	0
R347	0	0	0		0	0	0
R348	0	0	0		0	0	0
R349	0.03325	0.158862	0.280982		0.03325	0.158862	0.280977
R350	0.03325	0.158862	0.280982		0.03325	0.158872	0.280982
R351	0.093614	0.369326	0.640131		0.0936122	0.369331	0.640127
R351b	0.003252	0.004127	0.004977		0.00325212	0.00412699	0.004977
R352	5e-05	0.000225	0.000394		0	0	0
R354	0	0	0		0	0	0
R355	0	0	0		0	0	0
R356	0	0	0.000757		0	0	0
R357	0	0	0		0	0	0
R358	0.115845	0.18325	0.239846		0.115845	0.183252	0.239846
R359	9.6e-05	0.000428	0.000751		0	0	0
R361	9.6e-05	0.000428	0.000751		0	0	0
R362	0	0	0.000338		0	0	0
R363	0	0	0		0	0	0
R364	0	0	0.000338		0	0	0
R365	0	0	0.000338		0	0	0
R366	-0.000171	-0.000762	-0.001		0	0	0.000999996
R367	0	0	0		0	0	0
R368	0	0	0.000338		0	0	0
R369	0	0	0.000338		0	0	0
R370	0	0	0		0	0	0
R371	0	0	0		0	0	0
R372	0.000171	0.000762	0.001		0	0	0.000999996
R373	0	0	0		0	0	0
R374	0.000171	0.000762	0.001		0	0	0.000999998
R375	0.000171	0.000762	0.001		0	0	0.001
R376	0	0	0		0	0	0
R377	0.000425	0.001896	0.003805		0	0.001896	0.00380498
R378	0	0	0		0	0	0
R379	0	0	0		0	0	0
R380	0	0	0		0	0	0
R381	8.9e-05	0.000397	0.000697		0	0	0
R382	8.9e-05	0.000397	0.000697		0	0	0
R383	8.9e-05	0.000397	0.000697		0	0	0
R384	8.9e-05	0.000397	0.000697		0	0	0
R385	0.000178	0.000794	0.001393		0	0	0.0013929
R386	0.000178	0.000794	0.001393		0	0	0.00139301
R387	8.9e-05	0.000397	0.000697		0	0	0
R388	8.9e-05	0.000397	0.000697		0	0	0
R389	3.3e-05	0.000146	0.000256		0	0	0
R390	7.4e-05	0.000332	0.000582		0	0	0
R391	7.4e-05	0.000332	0.000582		0	0	0
R392	7.4e-05	0.000332	0.000582		0	0	0
R393	7.4e-05	0.000332	0.000582		0	0	0
R394	7.4e-05	0.000332	0.000582		0	0	0
R395	7.4e-05	0.000332	0.000582		0	0	0
R396	7.4e-05	0.000332	0.000582		0	0	0
R397	7.4e-05	0.000332	0.000582		0	0	0
R398	2e-06	1.1e-05	1.9e-05		0	0	0
R399	0	0	0		0	0	0
R400	0	0	0		0	0	0
R401	0	0	0		0	0	0
R402	0	0	0		0	0	0
R403	0	0	0		0	0	0
R404	0	0	0		0	0	0
R405	0	0	0		0	0	0
R406	0	0	0		0	0	0
R407	0	0	0		0	0	0
R408	0	0	0		0	0	0
R409	0	0	0		0	0	0
R410	0	0	0		0	0	0
R411	0	2e-06	3e-06		0	0	0
R412	3e-05	0.000134	0.000235		0	0	0
R413	3e-05	0.000134	0.000235		0	0	0
R414	3e-05	0.000134	0.000235		0	0	0
R415	3e-05	0.000134	0.000235		0	0	0
R416	3e-05	0.000134	0.000235		0	0	0
R417	3e-05	0.000134	0.000235		0	0	0
R418	3e-05	0.000134	0.000235		0	0	0
R419	0	0	0		0	0	0
R420	0	0	0		0	0	0
R421	0	0	0		0	0	0
R422	0	0	0		0	0	0
R423	0	0	0		0	0	0
R424	0	0	0		0	0	0
R425	0.031881	0.163141	0.290753		0.0318801	0.163138	0.290809
R426	0.00163	0.007279	0.012771		0.00163	0.007279	0.012771
R427	0.00163	0.007279	0.012771		0.00162963	0.007279	0.012771
R427b	2e-06	1.1e-05	1.9e-05		0	0	0
R427c	2e-06	1.1e-05	1.9e-05		0	0	0
R428	3.3e-05	0.000149	0.000262		0	0	0
R429	3.3e-05	0.000149	0.000262		0	0	0
R430	3.3e-05	0.000149	0.000262		0	0	0
R431	1.7e-05	7.5e-05	0.000131		0	0	0
R432	4e-06	1.9e-05	3.3e-05		0	0	0
R433	4e-06	1.9e-05	3.3e-05		0	0	0
R434	4e-06	1.8e-05	3.2e-05		0	0	0
R435	4e-06	1.8e-05	3.2e-05		0	0	0
R436	0	0	0		0	0	0
R437	4e-06	1.8e-05	3.2e-05		0	0	0
R438	4e-06	1.8e-05	3.2e-05		0	0	0
R439	4e-06	1.8e-05	3.2e-05		0	0	0
R440	0	0	1e-06		0	0	0
R441	0	0	1e-06		0	0	0
R442	0	0	1e-06		0	0	0
R443	0	0	1e-06		0	0	0
R444	0	0	1e-06		0	0	0
R445	0	0	1e-06		0	0	0
R446	0	0	1e-06		0	0	0
R447	0	0	1e-06		0	0	0
R448	0	0	1e-06		0	0	0
R449	0	0	1e-06		0	0	0
R450	0	0	1e-06		0	0	0
R451	0	0	1e-06		0	0	0
R452	0	0	1e-06		0	0	0
R453	0	0	1e-06		0	0	0
R454	0	0	1e-06		0	0	0
R455	0	0	1e-06		0	0	0
R456	0	0	1e-06		0	0	0
R457	0	0	1e-06		0	0	0
R458	0	0	0		0	0	0
R459	0	0	0		0	0	0
R460	0	0	0		0	0	0
R461	0	0	0		0	0	0
R462	0	0	0		0	0	0
R463	0	0	0		0	0	0
R464	0	0	0		0	0	0
R465	0	0	0		0	0	0
R466	7.9e-05	0.000197	0.000314		0	0	0
R467	7.9e-05	0.000197	0.000314		0	0	0
R468	7.9e-05	0.000197	0.000314		0	0	0
R469	7.9e-05	0.000197	0.000314		0	0	0
R470	7.9e-05	0.000197	0.000314		0	0	0
R471	7.9e-05	0.000197	0.000314		0	0	0
R472	7.9e-05	0.000197	0.000314		0	0	0
R473	7.9e-05	0.000197	0.000314		0	0	0
R474	0	0	0		0	0	0
R475	0	0	0		0	0	0
R476	0	0	0		0	0	0
R477	0	0	0		0	0	0
R478	0	0	0		0	0	0
R479	0	0	0		0	0	0
R480	0	0	0		0	0	0
R481	0	0	0		0	0	0
R482	0	0	0		0	0	0
R483	0	0	0		0	0	0
R484	0	0	0		0	0	0
R484b	0	0	0		0	0	0
R485	0	0	0		0	0	0
R486	2e-06	1.1e-05	1.9e-05		0	0	0
R487	0	0	0		0	0	0
R488	0	0	0		0	0	0
R489	0	0	0		0	0	0
R490	0	0	0		0	0	0
R491	0	0	0		0	0	0
R492	0	0	0		0	0	0
R493	0	0	0		0	0	0
R494	0	0	0		0	0	0
R495	0.001533	0.006843	0.012006		0.001533	0.00684299	0.012006
R496	2e-06	1.1e-05	1.9e-05		0	0	0
R497	0	0	0		0	0	0
R497b	2e-06	1.1e-05	1.9e-05		0	0	0
R498	0	0	0		0	0	0
R499	0	0	0		0	0	0
R500	0	0	0		0	0	0
R501	0	0	0		0	0	0
R502	0	0	0		0	0	0
R503	0	0	0		0	0	0
R504	0	0	0		0	0	0
R505	0	0	0		0	0	0
R506	0	0	0		0	0	0
R507	0	0	0		0	0	0
R508	9.8e-05	0.000436	0.000765		0	0	0
R509	0	0	0		0	0	0
R510	0	0	0		0	0	0
R511	-0.000309	-0.001378	-0.002418		0	0.001378	0.00241796
R512	0	0	0		0	0	0
R513	0	0	0		0	0	0
R514	0	0	0		0	0	0
R515	0	0	0		0	0	0
R516	0	0	0		0	0	0
R517	0	0	0		0	0	0
R518	0	0	0		0	0	0
R519	0	0	0		0	0	0
R520	0	0	0		0	0	0
R521	0	0	0		0	0	0
R522	0	0	0		0	0	0
R533	0	0	0		0	0	0
R534	0	0	0		0	0	0
R535	0	0	0		0	0	0
R536	0	0	0		0	0	0
R537	0.001	0.001	0.001		0.000999996	0.000999999	0.000999972
R538	0	0	0		0	0	0
R539	0.001	0.001	0.001		0.000999997	0.00099988	0.000999989
R540	0.001	0.001	0.001		0.001	0.000999999	0.000999998
R541	0.001954	0.001796	0.001642		0.001954	0.001796	0.001642
R542	0.001	0.001	0.001		0.000999997	0.00100005	0.000999997
R543	0.000477	0.000398	0.000321		0	0	0
R544	0.001477	0.001398	0.001321		0.001477	0.001398	0.00131966
R545	0.001477	0.001398	0.001321		0.001477	0.001398	0.001321
R546	0	0	0		0	0	0
R547	0.001477	0.001398	0.001321		0.00147702	0.001398	0.001321
R548	0.001477	0.001398	0.001321		0.00147699	0.00139791	0.001321
R549	0.002477	0.002398	0.002321		0.002477	0.002398	0.00232096
R550	0.001	0.001	0.001		0.00100009	0.001	0.000999998
R551	0.001477	0.001398	0.001321		0.001477	0.00139782	0.001321
R552	0	0	0		0	0	0
R553	0.001373	0.000935	0.000509		0.001373	0	0
R554	0.002845	0.002306	0.001782		0.002845	0.002306	0.001782
R555	0.002845	0.002306	0.001782		0.00284499	0.002306	0.001782
R556	0.004218	0.003241	0.002291		0.00421746	0.003241	0.00228972
R557	0.004689	0.003611	0.002564		0.0046875	0.003611	0.002564
R558	0.006323	0.003975	0.001693		0.00631954	0.003975	0.00169299
R559	0.007323	0.004975	0.002693		0.00732298	0.00497496	0.00269298
R560	0.010788	0.008319	0.005919		0.010786	0.008319	0.005919
R561	0.010788	0.008319	0.005919		0.010788	0.008319	0.005919
R562	0.010788	0.008319	0.005919		0.010788	0.008319	0.00591259
R563	0.011788	0.009319	0.006919		0.011788	0.00931641	0.00691906
R564	0.011788	0.009319	0.006919		0.011788	0.00931908	0.006919
R565	0.001471	0.001371	0.001273		0.001471	0.001371	0.001273
R566	0.002465	0.002344	0.002226		0.002465	0.002344	0.002226
R567	0.002465	0.002344	0.002226		0.002465	0.00234383	0.002226
R568	0.002465	0.002344	0.002226		0.0024648	0.00234401	0.002226
R569	0.002465	0.002344	0.002226		0.00246506	0.00234417	0.0022259
R570	0.002465	0.002344	0.002226		0.002465	0.002344	0.002226
R571	0	0	0		0	0	0
R571b	6.6e-05	0.000293	0.000515		0	0	0
R572	0.000924	0.00066	0.000403		0	0	0
R573	0.001924	0.00166	0.001403		0.001924	0.00166	0.00140303
R574	0.001924	0.00166	0.001403		0.00192383	0.0016597	0.00140345
R575	0.001471	0.001371	0.001273		0.001471	0.001371	0.001273
R576	0.002471	0.002371	0.002273		0.0024707	0.002371	0.002273
R577	0.004942	0.004742	0.004547		0.004942	0.004742	0.00454668
R578	0.004942	0.004742	0.004547		0.004942	0.004742	0.004547
R579	0.004942	0.004742	0.004547		0.004942	0.00474201	0.004547
R580	0.004942	0.004742	0.004547		0.00494189	0.004742	0.004547
R581	0.004942	0.004742	0.004547		0.004942	0.00474188	0.004547
R582	0.004942	0.004742	0.004547		0.004942	0.004742	0.004547
R583	3e-05	0.000135	0.000237		0	0	0
R587	3e-05	0.000135	0.000237		0	0	0
R588	3e-05	0.000135	0.000237		0	0	0
R589	3e-05	0.000135	0.000237		0	0	0
R590	0.001	0.001	0.001		0.00100008	0.000998826	0.000999677
R591	-0.004816	-0.50418	-1.00356		0.00481609	0.504709	1.00355
R592	0	0	0		0	0	0
R593	0	0	0		0	0	0
R594	7.7e-05	0.000344	0.000604		0	0	0
R595	7.7e-05	0.000344	0.000604		0	0	0
R596	7.7e-05	0.000344	0.000604		0	0	0
R597	7.7e-05	0.000344	0.000604		0	0	0
R598	7.7e-05	0.000344	0.000604		0	0	0
R599	1.3e-05	6e-05	0.000106		0	0	0
R600	0	0	0		0	0	0
R601	0	0	0		0	0	0
R602	6.4e-05	0.000284	0.000499		0	0	0
R603	2.3e-05	0.000104	0.000182		0	0	0
R604	1e-05	4.4e-05	7.7e-05		0	0	0
R605	0	0	0		0	0	0
R606	4e-05	0.00018	0.000317		0	0	0
R607	4e-05	0.00018	0.000317		0	0	0
R608	4e-05	0.00018	0.000317		0	0	0
R609	0	0	0		0	0	0
R610	4e-05	0.00018	0.000317		0	0	0
R611	4e-05	0.00018	0.000317		0	0	0
R612	2.7e-05	0.00012	0.000211		0	0	0
R613	2.7e-05	0.00012	0.000211		0	0	0
R614	1.3e-05	6e-05	0.000106		0	0	0
R615	0	0	0		0	0	0
R616	0	0	0		0	0	0
R617	0	0	0		0	0	0
R618	0.001533	0.006843	0.012006		0.001533	0.00684322	0.012006
R619	0	0	0		0	0	0
R620	9.8e-05	0.000436	0.000765		0	0	0
R621	9.8e-05	0.000436	0.000765		0	0	0
R622	9.8e-05	0.000436	0.000765		0	0	0
R623	9.8e-05	0.000436	0.000765		0	0	0
R624	7.8e-05	0.000349	0.000612		0	0	0
R625	7.8e-05	0.000349	0.000612		0	0	0
R626	7.8e-05	0.000349	0.000612		0	0	0
R627	7.8e-05	0.000349	0.000612		0	0	0
R628	2e-05	8.7e-05	0.000153		0	0	0
R629	2e-05	8.7e-05	0.000153		0	0	0
R630	2e-05	8.7e-05	0.000153		0	0	0
R631	2e-05	8.7e-05	0.000153		0	0	0
R632	5e-06	2.2e-05	3.8e-05		0	0	0
R633	5e-06	2.2e-05	3.8e-05		0	0	0
R634	1e-05	4.4e-05	7.6e-05		0	0	0
R635	5e-06	2.2e-05	3.8e-05		0	0	0
R636	5e-06	2.2e-05	3.8e-05		0	0	0
R637	9.8e-05	0.000436	0.000765		0	0	0
R638	9.8e-05	0.000436	0.000765		0	0	0
R639	9.8e-05	0.000436	0.000765		0	0	0
R640	9.8e-05	0.000436	0.000765		0	0	0
R641	9.8e-05	0.000436	0.000765		0	0	0
R642	9.8e-05	0.000436	0.000765		0	0	0
R643	3.3e-05	0.000149	0.000262		0	0	0
R644	0	0	0		0	0	0
R645	0	0	0		0	0	0
R646	0	0	0		0	0	0
R647	0	0	0		0	0	0
R648	0	0	0		0	0	0
R649	7.7e-05	0.000344	0.000604		0	0	0
R650	0	0	0		0	0	0
R651	0	0	0		0	0	0
R652	0	0	0		0	0	0
R653	0	0	0		0	0	0
R654	0	0	0		0	0	0
R655	0	0	0		0	0	0
R656	0	0	0		0	0	0
R657	0	0	0		0	0	0
R658	0	0	0		0	0	0
R659	0	0	0		0	0	0
R660	0	0	0		0	0	0
R661	0	0	0		0	0	0
R662	0	0	0		0	0	0
R663	0	0	0		0	0	0
R668	0	0	0		0	0	0
R669	0	0	0		0	0	0
R670	0	0	0		0	0	0
R671	0	0	0		0	0	0
R672	0	0	0		0	0	0
R673	0	0	0		0	0	0
R674	0	0	0		0	0	0
R678	0.000361	0.001457	0.002524		0	0.001457	0.002524
R679	0.000282	0.00126	0.002211		0	0.00126	0.002211
R680	0.000282	0.00126	0.002211		0	0.00126	0.002211
R681	0.000282	0.00126	0.002211		0	0.00125998	0.002211
R682	0.000282	0.00126	0.002211		0	0.00126009	0.00221051
R683	0.000282	0.00126	0.002211		0	0.00125977	0.002211
R684	0.000282	0.00126	0.002211		0	0.00125977	0.002211
R685	3.4e-05	0.000152	0.000267		0	0	0
R686	3.4e-05	0.000152	0.000267		0	0	0
R687	3.4e-05	0.000152	0.000267		0	0	0
R688	3e-05	0.000134	0.000235		0	0	0
R689	3e-05	0.000134	0.000235		0	0	0
R690	3e-05	0.000134	0.000235		0	0	0
R691	3e-05	0.000134	0.000235		0	0	0
R692	3e-05	0.000134	0.000235		0	0	0
R693	3e-05	0.000134	0.000235		0	0	0
R694	0	0	0		0	0	0
R695	0.003924	0.01752	0.030737		0.003924	0.01752	0.030737
R696	0.003924	0.01752	0.030737		0.003924	0.0175187	0.030737
R697	0.003924	0.01752	0.030737		0.00392403	0.0175199	0.0307232
R698	-0.00059	0.000831	0.002213		0	0	0.00221307
R699	0.000205	0.000916	0.001606		0	0	0.00160599
R700	7e-06	3.1e-05	5.4e-05		0	0	0
R701	7e-06	3.1e-05	5.4e-05		0	0	0
R702	7e-06	3.1e-05	5.4e-05		0	0	0
R705	7e-06	3.1e-05	5.4e-05		0	0	0
R706	7e-06	3.1e-05	5.4e-05		0	0	0
R707	7e-06	3.1e-05	5.4e-05		0	0	0
R708	7e-06	3.1e-05	5.4e-05		0	0	0
R709	7e-06	3.1e-05	5.4e-05		0	0	0
R710	7e-06	3.1e-05	5.4e-05		0	0	0
R711	0.000205	0.000916	0.001606		0	0	0.00160631
R712	0	0	0		0	0	0
R713	0	0	0.000606		0	0	0
R714	0	0	0		0	0	0
R715	-0.000417	-0.001862	-0.003266		0	0.00186199	0.00326569
R716	0.000417	0.001862	0.003266		0	0.00186203	0.003266
R717	0.000417	0.001862	0.003266		0	0.001862	0.003266
R718	0.000205	0.000916	0.001606		0	0	0.00160598
R719	0.000205	0.000916	0.001606		0	0	0.001606
R722	0.000144	0.000641	0.001125		0	0	0.001125
R723	0.000205	0.000916	0.001606		0	0	0.001606
R724	0.000205	0.000916	0.001606		0	0	0.00160596
R725	0.000205	0.000916	0.001606		0	0	0.001606
R726	0.000205	0.000916	0.001606		0	0	0.00160549
R727	0.000205	0.000916	0.001606		0	0	0.00160585
R728	0.000205	0.000916	0.001606		0	0	0.001606
R729	0.000205	0.000916	0.001606		0	0	0.00160599
R730	0.000205	0.000916	0.001606		0	0	0.00160465
R731	7e-06	3.1e-05	5.4e-05		0	0	0
PROT	0.000879	0.003925	0.006887		0	0.00392527	0.0068872
RNA	0.000148	0.00066	0.001159		0	0	0.001159
DNA	9e-05	0.000404	0.000708		0	0	0
SM_MOL	0.000205	0.000917	0.001609		0	0	0.00160952
PE	2.5e-05	0.00011	0.000193		0	0	0
TAG	0	0	0		0	0	0
PIMS	0.000164	0.000734	0.001287		0	0	0.001287
LAM	0.000764	0.003412	0.005986		0	0.003412	0.005986
MAPC	0.000854	0.003815	0.006694		0	0.003815	0.00669399
P-L-GLX	0.000144	0.000642	0.001126		0	0	0
CL	0	0	0		0	0	0
LM	4.9e-05	0.000218	0.000383		0	0	0
TDM	0	0	0		0	0	0
TMM	0.000203	0.000908	0.001593		0	0	0.00159307
DAT	0	0	0		0	0	0
PAT	0	0	0		0	0	0
MPD	0	0	0		0	0	0
DIM	0	0	0		0	0	0
PGL	0	0	0		0	0	0
SL-1	0	0	0		0	0	0
GLUCAN	0	0	0		0	0	0
BIOMASSe	0.004108	0.018342	0.032181		0.00410772	0.0183417	0.032181
BXT	0	0	0		0	0	0
R800	0.138854	0.806278	1.46646		0.138819	0.806254	1.46645
R801	0	0	0		0	0	0
R802	0	0	0		0	0	0
R803	0	0	0		0	0	0
R804	0.439346	0.947512	1.44463		0.4393	0.947532	1.44397
R805	-0.216662	-0.180153	-0.144405		0.216667	0.18015	0.144422
R806	0.001	0.001	0.001		0.00100019	0.00100014	0.00100038
R807	0.001	0.001	0.001		0.000999967	0.000999981	0.0010002
R808	0.001	0.001	0.001		0.00100001	0.000999915	0.00100023
R809	0.001	0.001	0.001		0.000999994	0.000999556	0.0010002
R810	0	0	0		0	0	0
R811	0	0.001	0.001		0	0.00100014	0.000999383
R812	0	0.5	1		0	0.500339	1
R814	0	0.000571	0.001		0	0	0.000999997
R815	0.001	0.001	0.001		0.001	0.000999995	0.00100033
R816	0.000171	0.000762	0.001		0	0	0.000999927
R817	0.001	0.001	0.001		0.00100021	0.00100036	0.00100001
R818	0	0	0		0	0	0
R819	0	0	0.000757		0	0	0
R820	0.001	0.001	0.001		0.000999997	0.001	0.001
R821	0.000612	0.001	0.001		0	0.001	0.000999999
R822	0.001	0.001	0.001		0.000999999	0.000999999	0.001
R823	0.001	0.001	0.001		0.000999999	0.000999999	0.001
R824	0.001	0.001	0.001		0.001	0.000999999	0.001
R825	0.001	0.001	0.001		0.000999999	0.000999995	0.001
R826	0	0.000413	0.001		0	0	0.000999688
R827	0.000205	0.000916	0.001		0	0	0.000999704
R828	0.000205	0.000916	0.001		0	0	0.001
R829	0.001	0.001	0.001		0.001	0.000999999	0.000999999
R830	0.001	0.001	0.001		0.001	0.001	0.001
R831	0	0	0.000432		0	0	0
R832	0.001	0.001	0.001		0.001	0.001	0.000999999
R833	0	0.001	0.001		0	0.000999999	0.001
R834	0	0	0.000322		0	0	0
R835	0.000316	0.001	0.001		0	0.001	0.00100001
R836	0.001	0.001	0.001		0.001	0.000999996	0.000999999
R837	0.001	0.001	0.001		0.000999996	0.000999997	0.001
R838	0.110581	0.493442	0.866144		0.110581	0.493442	0.866142
R839	0.001	0.001	0.001		0.000999999	0.001	0.001
R840	0.001	0.001	0.001		0.000999998	0.000999999	0.000999999
R841	0	0	0.000479		0	0	0
R842	0.001	0.001	0.001		0.000999972	0.001	0.001
R843	0.001	0.001	0.001		0.000999996	0.000999989	0.000999986
R844	0.001	0.001	0.001		0.000999996	0.000999999	0.000999995
R845	0.001	0.001	0.001		0.00100002	0.00100001	0.000999997
R846	0.001	0.001	0.001		0.000999965	0.001	0.001
R847	0.001	0.001	0.001		0.00099999	0.001	0.001
R848	0.001	0.001	0.001		0.00100001	0.00099999	0.000999997
R849	0.001	0.001	0.001		0.00100001	0.00100001	0.000999998
R850	0.001	0.001	0.001		0.001	0.000999998	0.000999981
R851	0.001	0.001	0.001		0.001	0.001	0.001
R852	0.001	0.001	0.001		0.001	0.001	0.000999999
R853	0.001	0.001	0.001		0.00100001	0.000999999	0.001
R854	0	0	0		0	0	0
R855	0.001	0.001	0.001		0.001	0.000999998	0.001
R856	0	0	0		0	0	0
R857	0	0	0		0	0	0
R858	0.001	0.001	0.001		0.001	0.001	0.001
R859	0.001	0.001	0.001		0.000999998	0.000999992	0.000999993
R860	0.001	0.001	0.001		0.000999997	0.00099965	0.00100001
R861	0.001	0.001	0.001		0.001	0.001	0.000999997
R862	0.001	0.001	0.001		0.001	0.001	0.000999996
R863	0.001	0.001	0.001		0.001	0.000999997	0.000999997
R864	0.001	0.001	0.001		0.001	0.000999996	0.001
R865	0	0	0		0	0	0
R866	0.001	0.001	0.001		0.00100011	0.001	0.000999987
R867	0.000352	0.001	0.001		0	0.001	0.001
R868	0.001	0.001	0.001		0.000999998	0.000999999	0.000999997
R869	0.000817	0.000184	0		0	0	0
R870	0.001	0.001	0.001		0.001	0.000999992	0.000999995
R871	0	0	0		0	0	0
R872	0.001	0.001	0.001		0.000999998	0.00100001	0.000999996
R873	0.001	0.001	0.001		0.000999999	0.001	0.001
R874	0.00079	0.001	0.001		0	0.001	0.001
R875	0	0	0		0	0	0
R876	0.001	0.001	0.001		0.001	0.001	0.000999985
R877	0.001	0.001	0.001		0.000999999	0.00100001	0.00100001
R878	0.000831	0.000246	0		0	0	0
R879	0.001	0.001	0.001		0.001	0.001	0.001
R880	0.001	0.001	0.001		0.00100003	0.001	0.000999996
R881	0.000229	0.001	0.001		0	0.00100001	0.001
R882	0.001	0.001	0.001		0.001	0.000999998	0.000999973
R883	0.001	0.001	0.001		0.00100002	0.00100003	0.000999997
R884	0	0	0		0	0	0
R885	0.001	0.001	0.001		0.001	0.000999998	0.000999989
R886	0.001	0.001	0.001		0.000999998	0.000999985	0.000999996
R887	0	0	0		0	0	0
R888	0.001	0.001	0.001		0.001	0.001	0.00100001
R889	0.001	0.001	0.001		0.000999991	0.000999644	0.000999995
R890	0	0	0		0	0	0
R891	0.001	0.001	0.001		0.000999997	0.000999991	0.000999998
R892	0	0	0		0	0	0
R893	0.000116	0.000518	0.000909		0	0	0
R894	0.000164	0.000734	0.001		0	0	0.001
R895	0.000346	0.001	0.001		0	0.00100001	0.000999999
R896	0	0	0		0	0	0
R897	0.001	0.001	0.001		0.001	0.00100001	0.001
R898	0	0	0		0	0	0
R899	0.001	0.001	0.001		0.000999997	0.00100015	0.000999997
R900	0.001	0.001	0.001		0.001	0.000999996	0.00100033
R901	0.001	0.001	0.001		0.001	0.000999906	0.000999999
R902	0.001	0.001	0.001		0.001	0.000999997	0.001
R903	0	0	0		0	0	0
R904	0.001	0.001	0.001		0.001	0.000999997	0.001
R905	0	0	0		0	0	0
R906	0.001	0.001	0.001		0.001	0.001	0.000999997
R907	0.001	0.001	0.001		0.00100192	0.000999993	0.00100007
R908	0.001	0.001	0.001		0.000999948	0.000999998	0.00100032
R909	0.001	0.001	0.001		0.000999997	0.00100019	0.000999997
R910	0.001	0.001	0.001		0.000999998	0.000999988	0.00100041
R911	0.001	0.001	0.001		0.00100003	0.000999996	0.00100021
R912	0.001	0.001	0.001		0.00099994	0.000999826	0.00100008
R913	0.001	0.001	0.001		0.00100001	0.000999907	0.000999996
R914	0.001	0.001	0.001		0.000999997	0.000999996	0.00100041
R915	0.001	0.001	0.001		0.00100004	0.001	0.000999546
R916	0.001	0.001	0.001		0.00099979	0.00100019	0.0010001
R917	0.001	0.001	0.001		0.000999944	0.00100002	0.001
R918	0.001	0.001	0.001		0.000999845	0.00100001	0.00100005
R919	0.001	0.001	0.001		0.000999998	0.000999955	0.00100004
R920	0.001	0.001	0.001		0.00100001	0.001	0.000999998
R921	0.001	0.001	0.001		0.00100012	0.00100031	0.000999556
R922	0.001	0.001	0.001		0.0010006	0.00100004	0.000999997
R923	0	0	0		0	0	0
R924	5e-06	2.2e-05	3.9e-05		0	0	0
R925	2e-06	7e-06	1.2e-05		0	0	0
R926	0	0	0		0	0	0
R927	0	0	0		0	0	0
R928	0	0	0		0	0	0
R929	0	0	0		0	0	0
R930	0	0	0		0	0	0
R931	0	0	0		0	0	0
